# Supplementary material
Source: HighWire-hosted journal article supplement (https://bmjopen.bmj.com/content/12/3/e058425)
Supplement: inline-supplementary-material-2 [file inline-supplementary-material-2.pdf]

## Supplementary Material 2: Full Search Strategies for All Databases.

| Database        | Search Strategy                                                                                                                                                                                                                                                                                                                                                                                                                                                                                                                                                                                                                                                                                                                                                                                                                                                                                                                                                                                                                                                                                                                                                                                                                                                                                                                                                                                                                                                                                                                                                                                                                                                                                                                                                                                                                                                                                                                                       |
|-----------------|-------------------------------------------------------------------------------------------------------------------------------------------------------------------------------------------------------------------------------------------------------------------------------------------------------------------------------------------------------------------------------------------------------------------------------------------------------------------------------------------------------------------------------------------------------------------------------------------------------------------------------------------------------------------------------------------------------------------------------------------------------------------------------------------------------------------------------------------------------------------------------------------------------------------------------------------------------------------------------------------------------------------------------------------------------------------------------------------------------------------------------------------------------------------------------------------------------------------------------------------------------------------------------------------------------------------------------------------------------------------------------------------------------------------------------------------------------------------------------------------------------------------------------------------------------------------------------------------------------------------------------------------------------------------------------------------------------------------------------------------------------------------------------------------------------------------------------------------------------------------------------------------------------------------------------------------------------|
| CINAHL Complete | TX ( breast cancer or breast tumor or breast neoplasm or breast carcinoma or early-stage breast cancer or early breast cancer ) AND TX ( regret or decision regret ) AND TX ( treatment or intervention or therapy )<br>Filters: publication time from 2000-2021                                                                                                                                                                                                                                                                                                                                                                                                                                                                                                                                                                                                                                                                                                                                                                                                                                                                                                                                                                                                                                                                                                                                                                                                                                                                                                                                                                                                                                                                                                                                                                                                                                                                                      |
| Embase          | 1. (breast cancer or breast tumor or breast neoplasm or breast carcinoma or early-stage breast cancer or early breast cancer).mp.<br>2. Limit 1 to (full text and yr="2000 - 2021")<br>3. (regret or decision regret).mp.<br>4. Limit 3 to (full text and yr="2000 - 2021")<br>5. (treatment or intervention or therapy).mp<br>6. Limit 5 to (full text and yr="2000 - 2021")<br>7. 1 and 2 and 3 and 4 and 5 and 6                                                                                                                                                                                                                                                                                                                                                                                                                                                                                                                                                                                                                                                                                                                                                                                                                                                                                                                                                                                                                                                                                                                                                                                                                                                                                                                                                                                                                                                                                                                                   |
| PubMed          | ((("breast neoplasms"[MeSH Terms] OR ("breast"[All Fields] AND "neoplasms"[All Fields]) OR "breast neoplasms"[All Fields] OR ("breast"[All Fields] AND "cancer"[All Fields]) OR "breast cancer"[All Fields]) AND ("breast neoplasms"[MeSH Terms] OR ("breast"[All Fields] AND "neoplasms"[All Fields]) OR "breast neoplasms"[All Fields] OR ("breast"[All Fields] AND "tumor"[All Fields]) OR "breast tumor"[All Fields])) OR ("breast neoplasms"[MeSH Terms] OR ("breast"[All Fields] AND "neoplasms"[All Fields]) OR "breast neoplasms"[All Fields] OR ("breast"[All Fields] AND "neoplasm"[All Fields]) OR "breast neoplasm"[All Fields]) OR ("breast neoplasms"[MeSH Terms] OR ("breast"[All Fields] AND "neoplasms"[All Fields]) OR "breast neoplasms"[All Fields] OR ("breast"[All Fields] AND "carcinoma"[All Fields]) OR "breast carcinoma"[All Fields]) OR ("early"[All Fields] AND ("stage"[All Fields] OR "staged"[All Fields] OR "stages"[All Fields] OR "staging"[All Fields] OR "stagings"[All Fields]) AND ("breast neoplasms"[MeSH Terms] OR ("breast"[All Fields] AND "neoplasms"[All Fields]) OR "breast neoplasms"[All Fields] OR ("breast"[All Fields] AND "cancer"[All Fields]) OR "breast cancer"[All Fields])) OR ("early"[All Fields] AND ("breast neoplasms"[MeSH Terms] OR ("breast"[All Fields] AND "neoplasms"[All Fields]) OR "breast neoplasms"[All Fields] OR ("breast"[All Fields] AND "cancer"[All Fields]) OR "breast cancer"[All Fields]))) AND ("emotions"[MeSH Terms] OR "emotions"[All Fields] OR "regret"[All Fields] OR "regrets"[All Fields] OR "regretful"[All Fields] OR "regretted"[All Fields] OR "regretting"[All Fields] OR ("decision"[All Fields] OR "decision s"[All Fields] OR "decisions"[All Fields] OR "decisive"[All Fields] OR "decisively"[All Fields]) AND ("emotions"[MeSH Terms] OR "emotions"[All Fields] OR "regret"[All Fields] OR "regrets"[All Fields] OR "regretful"[All Fields] OR |

---

"regretted"[All Fields] OR "regretting"[All Fields])) AND ("therapeutics"[MeSH Terms] OR "therapeutics"[All Fields] OR "treatments"[All Fields] OR "therapy"[MeSH Subheading] OR "therapy"[All Fields] OR "treatment"[All Fields] OR "treatment s"[All Fields] OR ("intervention s"[All Fields] OR "interventions"[All Fields] OR "interventive"[All Fields] OR "methods"[MeSH Terms] OR "methods"[All Fields] OR "intervention"[All Fields] OR "interventional"[All Fields]) OR ("therapeutics"[MeSH Terms] OR "therapeutics"[All Fields] OR "therapies"[All Fields] OR "therapy"[MeSH Subheading] OR "therapy"[All Fields] OR "therapy s"[All Fields] OR "therapys"[All Fields])) AND (2000:2021[pdat]))

---

Medline

1. (breast cancer or breast tumor or breast neoplasm or breast carcinoma or early-stage breast cancer or early breast cancer).mp.
2. Limit 1 to (full text and yr="2000 - 2021")
3. (regret or decision regret).mp.
4. Limit 3 to (full text and yr="2000 - 2021")
5. (treatment or intervention or therapy).mp.
6. Limit 5 to (full text and yr="2000 - 2021")
7. 1 and 2 and 3 and 4 and 5 and 6

---

Web of Science

((ALL=(breast cancer or breast tumor or breast neoplasm or breast carcinoma or early-stage breast cancer or early breast cancer)) AND ALL=(regret or decision regret)) AND ALL=(treatment or intervention or therapy )

Filters: publication time from 2000.01.01-2021.06.30

---
